# Supplementary material
Source: publisher figshare collection journal article supplement (https://gsajournals.figshare.com/articles/dataset/_/6512966)
Supplement: Supplementary file 2 [file 1]

FILE S2. SUPPLEMENTAL TABLES

Table S1: The bacterial strains used in this report

| Strain      | Relevant genotype                                | Donor  | Recipient           | Target gene               | Method | Reference                                                    |
|-------------|--------------------------------------------------|--------|---------------------|---------------------------|--------|--------------------------------------------------------------|
| PFM2        | MG1665 <i>rph</i> <sup>+</sup>                   |        |                     |                           |        | (LEE <i>et al.</i> 2012)                                     |
| PFM5        | $\Delta mutL^{Sc}$                               |        |                     |                           |        | (LEE <i>et al.</i> 2012)                                     |
| PFM6        | $\Delta mutY^{Sc}$                               |        |                     |                           |        | (FOSTER <i>et al.</i> 2015)                                  |
| PFM91       | $\Delta nij^{Sc}$                                |        |                     |                           |        | (FOSTER <i>et al.</i> 2015)                                  |
| PFM101      | $\Delta umuDC^{Sc} \Delta dinB$                  |        |                     |                           |        | (FOSTER <i>et al.</i> 2015)                                  |
| PFM118      | $\Delta mutL^{Sc} \Delta umuDC^{Sc} \Delta dinB$ | JW4128 | PFM101              | $\Delta mutL::Kn^R$       | B      | This Study                                                   |
| PFM137      | $\Delta mutL^{Sc} \Delta mutY^{Sc}$              | JW4128 | PFM6                | $\Delta mutL::Kn^R$       | B      | This Study                                                   |
| PFM144      | $\Delta mutL^{Sc}$                               | JW4128 | PFM2                | $\Delta mutL::Kn^R$       | B      | This Study                                                   |
| PFM191      | $\Delta uvrD^{Sc}$                               | JW3786 | PFM2                | $\Delta uvrD::Kn^R$       | B      | This Study                                                   |
| PFM197      | $\Delta mutH^{Sc}$                               | JW2799 | PFM2                | $\Delta mutH::Kn^R$       | B      | This Study                                                   |
| PFM244      | $\Delta mutL$                                    |        | PFM2                | $\Delta mutL::cat-I-Scel$ | C      | This Study                                                   |
| PFM282      | $\Delta purA::Kn^R$                              | JW4135 | PFM2                | $\Delta purA::Kn^R$       | D      | This Study                                                   |
| PFM286      | $\Delta mfd^{Sc}$                                | JW1100 | PFM2                | $\Delta mfd::Kn^R$        | B      | This Study                                                   |
| PFM288      | $\Delta mutL$                                    | PFM244 | PFM282              | $\Delta mutL$             | A      | This Study                                                   |
| PFM292      | $\Delta mfd^{Sc} \Delta purA::Kn^R$              | JW4135 | PFM286              | $\Delta purA::Kn^R$       | D      | This Study                                                   |
| PFM294      | $\Delta mutL \Delta mfd^{Sc}$                    | PFM244 | PFM292              | $\Delta mutL$             | A      | This Study                                                   |
| PFM304      | $\Delta mutL \Delta mutS^{Sc}$                   | JW2703 | PFM288              | $\Delta mutS::Kn^R$       | B      | This Study                                                   |
| *PFM326/327 | $\Delta srlD::Kn^R$                              | JW2674 | PFM2                | $\Delta srlD::Kn^R$       | D      | This Study                                                   |
| PFM332      | $\Delta mutS$                                    |        | PFM2                | $\Delta mutS::cat-I-Scel$ | C      | This Study                                                   |
| PFM342      | $\Delta mutS$                                    | PFM332 | PFM326              | $\Delta mutS$             | E      | This Study                                                   |
| PFM343      | $\Delta mutS$                                    | PFM332 | PFM327              | $\Delta mutS$             | E      | This Study                                                   |
| PF1716      | <i>srlD::Tn10</i>                                | RH4695 | FC36                | <i>srlD::Tn10</i>         | D      | (FOSTER AND CAIRNS 1992; MAENHAUT-MICHEL <i>et al.</i> 1992) |
| PFM366      | $\Delta mfd^{Sc} srlD::Tn10$                     | PF1716 | PFM286              | <i>srlD::Tn10</i>         | D      | This Study                                                   |
| PFM368      | $\Delta mutS \Delta mfd^{Sc}$                    | PFM332 | PFM366              | $\Delta mutS$             | E      | This Study                                                   |
| PFM550      | $\Delta mutS \Delta mutH^{Sc}$                   | JW2799 | PFM342              | $\Delta mutH::Kn^R$       | B      | This Study                                                   |
| *PFM555/556 | $\Delta mutS^{Sc}$                               | JW2703 | PFM2                | $\Delta mutS::Kn^R$       | B      | This Study                                                   |
|             | $\Delta mutS \Delta mutH^{Sc}$                   |        |                     |                           |        |                                                              |
| PFM557      | $\Delta purA::Kn^R$                              | JW4135 | PFM550              | $\Delta purA::Kn^R$       | D      | This Study                                                   |
| *PFM567/568 | $\Delta mutS \Delta mutL \Delta mutH^{Sc}$       | PFM244 | PFM557              | $\Delta mutL$             | A      | This Study                                                   |
| PFM627      | $\Delta ndk^{Sc}$                                | JW2502 | PFM2                | $\Delta ndk::Kn^R$        | B      | This Study                                                   |
| PFM666      | $\Delta mutL^{Sc} \Delta ndk^{Sc}$               | JW4128 | PFM627              | $\Delta mutL::Kn^R$       | B      | This Study                                                   |
| PFM794      | $\Delta nij^{Sc} \Delta mutL$                    | PFM244 | PFM91               | $\Delta purA::Kn^R$       | A      | This Study                                                   |
| PFM798      | $\Delta rdgB^{Sc}$                               | JW2921 | PFM2                | $\Delta rdgB::Kn^R$       | B      | This Study                                                   |
| PFM800      | $\Delta rdgB^{Sc} \Delta mut$                    | PFM244 | $\Delta purA::Kn^R$ | $\Delta purA::Kn^R$       | A      | This Study                                                   |

\* Two isolates from the same transduction.

**A.** P1 phage transduction (MILLER 1992) from donor selecting for prototrophy on minimal glucose medium; **B.** P1 phage transduction from donor selecting for  $Kn^R$ , followed by FLP recombination to remove the  $Kn^R$  element, which leaves an in-frame scar sequence (DATSENKO AND WANNER 2001), which is indicated by superscript Sc; **C.** Scarless gene deletion using a *cat-I-Scel* cassette (BLANK *et al.* 2011); **D.** P1 phage transduction from donor selecting for drug resistance; **E.** P1 phage transduction from donor selecting for ability to utilize sorbitol as a carbon source. JW strains are from the Keio collection of gene knockouts (BABA *et al.* 2006).

**Table S2: The oligonucleotides used in this study**

| Relevant genotype        | Name                | Sequence, 5' to 3'                                                                                           | Reference                   |
|--------------------------|---------------------|--------------------------------------------------------------------------------------------------------------|-----------------------------|
| <i>ΔmutL::cat-I</i> Scel | mutLreadthru        | GGTGACGACGCCAGATCGCACGCTGCCAACTAAGGACGATTGATGCCAAT<br>TGATGAGTGATATCAGTAAGGCGAGCCTGCCTAAGGCGATTTTTTGGATGGGG  |                             |
|                          | mutLpWGR100downstrm | CCCCATCAAAAAATCGCCTTAGGCAGGCTCGCCTTACTGATATCACTCATCC<br>TAGACTATATTACCCTGTT                                  |                             |
|                          | mutLpWGR100upstrm   | GGTGACGACGCCAGATCGCACGCTGCCAACTAAGGACGATTGATGCCAAT<br>TCGCCTTACGCCCCGCCCTGC                                  |                             |
| <i>ΔmutS::cat-I</i> Scel | mutSreadthru2       | AATAAAACCATCACACCCCATTTAATATCAGGGAACCGGACATAACCCCATG<br>TAACAATTCGGGATAGTCTTTTGTCTATCGGGAATATTAACGACAACCTGAC |                             |
|                          | mutSright_pWGR100   | AGCAAAAGACTATCGGGAATTGTTATTACACCAGGCTCTTCAAGCGATACTA<br>GACTATATTACCCTGTT                                    |                             |
|                          | mutSleft_pWGR100    | AATAAAACCATCACACCCCATTTAATATCAGGGAACCGGACATAACCCCG<br>CCTTACGCCCCGCCCTGC                                     |                             |
| <i>mutL</i>              | mutL Fw             | GGCCTGCGCAATTACTTCCTTG                                                                                       | (LEE <i>et al.</i> 2012)    |
|                          | mutL Rv             | CGCAGCTCAATGGCTAACGC                                                                                         | (LEE <i>et al.</i> 2012)    |
| <i>mutS</i>              | mutSfw              | CATCAAGAACTCGCCGTTTCG                                                                                        |                             |
|                          | mutSrv              | TAGCGTGTAGATGGCATGGTT                                                                                        |                             |
| <i>mutH</i>              | mutH Fw             | CGGGTTGGCGAAAGATCAAC                                                                                         |                             |
|                          | mutH Rv             | GCGCCGAGGAATGATGAAAC                                                                                         |                             |
| <i>uvrD</i>              | uvrD Fw             | AGGCTTGTTGGATCAGACCG                                                                                         |                             |
|                          | uvrD Rv             | ATGGGAACGCCGTGTTTTTG                                                                                         |                             |
| <i>umuDC</i>             | umuC downstream rv  | CGATGGCGCCGAGCGTC                                                                                            | (FOSTER <i>et al.</i> 2015) |
|                          | umuD upstream fwd   | GCCGGGTGATATTTTTC                                                                                            | (FOSTER <i>et al.</i> 2015) |
| <i>dinB</i>              | dinB del 201–3 F    | GGGCAACCGGCGCATTGAGA                                                                                         | (FOSTER <i>et al.</i> 2015) |
|                          | dinB del 201-3 R    | GGAAGCGCGCCTTTATGGGCT                                                                                        |                             |
| <i>mutY</i>              | mutY Fw             | GCAAGCATGATAAGGCCGTG                                                                                         |                             |
|                          | mutY Rv             | TCAGCATGGTTTGCTTGTGC                                                                                         |                             |
| <i>mfd</i>               | mfd FW              | GTGTTGGCTTTTGCCGGTAG                                                                                         |                             |
|                          | mfd Rv              | AGCGATCTGTTGTTCTCCCC                                                                                         |                             |
| <i>ndk</i>               | ndk FW(2)           | ATGGATGACGTGGGGCAAAT                                                                                         |                             |
|                          | ndk RV(2)           | CGGTTGAGATCCAGCAGGTT                                                                                         |                             |

**Table S3: Results from the mutation accumulation experiments presented in this report.**

| Strain                                                | Defect                 | MA<br>lines | Genera-<br>tions | Basepair Substitutions |         |         |         |         |         |         |
|-------------------------------------------------------|------------------------|-------------|------------------|------------------------|---------|---------|---------|---------|---------|---------|
|                                                       |                        |             |                  | Total                  | A:T>G:C | G:C>A:T | A:T>T:A | G:C>T:A | A:T>C:G | G:C>C:G |
| <u>MA experiments on LB</u>                           |                        |             |                  |                        |         |         |         |         |         |         |
| *Wild type                                            | —                      | 341         | 2015066          | 1933                   | 388     | 664     | 162     | 302     | 307     | 110     |
| #PFM5                                                 | <i>mutL</i>            | 34          | 12750            | 1625                   | 1141    | 447     | 14      | 10      | 10      | 3       |
| PFM144                                                | <i>mutL</i>            | 25          | 14367            | 1350                   | 1011    | 283     | 15      | 9       | 20      | 12      |
| PFM288                                                | <i>mutL</i>            | 38          | 22382            | 2709                   | 2130    | 491     | 29      | 16      | 30      | 13      |
| PFM304                                                | <i>mutL mutS</i>       | 43          | 25270            | 2845                   | 2314    | 447     | 30      | 13      | 25      | 16      |
| PFM342                                                | <i>mutS</i>            | 29          | 17041            | 2410                   | 1915    | 442     | 20      | 9       | 18      | 6       |
| PFM343                                                | <i>mutS</i>            | 43          | 21922            | 2797                   | 2128    | 593     | 30      | 14      | 20      | 12      |
| <sup>†</sup> PFM555/556                               | <i>mutS</i>            | 41          | 24148            | 2764                   | 2122    | 591     | 19      | 5       | 17      | 10      |
| PFM197                                                | <i>mutH</i>            | 37          | 99960            | 10896                  | 7483    | 3093    | 122     | 66      | 93      | 39      |
| PFM567                                                | <i>mutLSH</i>          | 23          | 14752            | 1546                   | 1088    | 417     | 4       | 17      | 11      | 9       |
| PFM568                                                | <i>mutLSH</i>          | 21          | 12367            | 1119                   | 737     | 361     | 8       | 6       | 4       | 3       |
| PFM191                                                | <i>uvrD</i>            | 42          | 115746           | 6938                   | 4414    | 2225    | 83      | 75      | 89      | 52      |
| PFM118                                                | <i>mutL umuDC dinB</i> | 23          | 12078            | 1110                   | 798     | 282     | 10      | 7       | 7       | 6       |
| PFM137                                                | <i>mutL mutY</i>       | 19          | 11019            | 1477                   | 1104    | 253     | 14      | 94      | 7       | 5       |
| PFM294                                                | <i>mutL mfd</i>        | 32          | 19554            | 2126                   | 1704    | 372     | 18      | 9       | 16      | 7       |
| PFM368                                                | <i>mutS mfd</i>        | 45          | 22942            | 3218                   | 2487    | 652     | 30      | 13      | 26      | 10      |
| PFM666                                                | <i>mutL ndk</i>        | 40          | 22067            | 13542                  | 12283   | 599     | 69      | 47      | 529     | 15      |
| <u>MA experiments on minimal medium</u>               |                        |             |                  |                        |         |         |         |         |         |         |
| <sup>‡</sup> PFM2                                     | Wild type              | 50          | 308230           | 277                    | 39      | 128     | 24      | 44      | 30      | 12      |
| PFM5                                                  | <i>mutL</i>            | 48          | 28197            | 1435                   | 663     | 740     | 5       | 13      | 4       | 10      |
| PFM343                                                | <i>mutS</i>            | 46          | 26280            | 1608                   | 764     | 804     | 10      | 13      | 3       | 14      |
| PFM137                                                | <i>mutL mutY</i>       | 24          | 14205            | 1431                   | 408     | 487     | 7       | 517     | 2       | 10      |
| Buffered LB                                           |                        |             |                  |                        |         |         |         |         |         |         |
| PFM144                                                | <i>mutL</i>            | 24          | 13389            | 1291                   | 863     | 387     | 13      | 9       | 11      | 8       |
| <u>MA experiments on diluted LB</u>                   |                        |             |                  |                        |         |         |         |         |         |         |
| PFM343                                                | <i>mutS</i>            | 40          | 22495            | 3546                   | 2205    | 1256    | 30      | 21      | 20      | 14      |
| <u>MA experiments on supplemented minimal medium</u>  |                        |             |                  |                        |         |         |         |         |         |         |
| PFM343                                                | <i>mutS</i>            | 39          | 23017            | 2476                   | 1276    | 1130    | 16      | 28      | 15      | 11      |
| <u>MA experiments on LB at low temperature (28°C)</u> |                        |             |                  |                        |         |         |         |         |         |         |
| PFM342                                                | <i>mutS</i>            | 44          | 24875            | 1259                   | 742     | 496     | 3       | 6       | 4       | 8       |

\*Eight experiments reported in references (LEE *et al.* 2012) and (FOSTER *et al.* 2015) are combined; the strains are PFM2, wild type (two data sets, 3K and 6K generations), PFM35, *uvrA*, PFM40, *alkA tagA*, PFM88, *ada ogt*, PFM91, *nfi*, PFM101, *umuDC dinB*, PFM133, *umuDC dinB polB*.

#Data are from (LEE *et al.* 2012)

†The MA experiment used two isolates from the same transduction as founders.

‡Data are from (FOSTER *et al.* 2015)

**Table S4A: BPS rates and spectra of the MMR defective strains on LB medium at 37°C**

| Strain     | Genotype              | Total       | A:T>G:C     | Mutations/Generation/Nt x 10 <sup>8</sup> ± 95% CL |             |             |             |              |
|------------|-----------------------|-------------|-------------|----------------------------------------------------|-------------|-------------|-------------|--------------|
|            |                       |             |             | G:C>A:T                                            | A:T>T:A     | G:C>T:A     | A:T>C:G     | G:C>C:G      |
| *PFM5      | <i>mutL</i>           | 2.75 ± 0.22 | 3.92 ± 0.38 | 1.49 ± 0.17                                        | 0.05 ± 0.02 | 0.03 ± 0.02 | 0.03 ± 0.02 | 0.01 ± 0.01  |
| PFM144     | <i>mutL</i>           | 2.03 ± 0.17 | 3.08 ± 0.31 | 0.84 ± 0.11                                        | 0.05 ± 0.03 | 0.03 ± 0.02 | 0.06 ± 0.03 | 0.04 ± 0.02  |
| PFM288     | <i>mutL</i>           | 2.61 ± 0.18 | 4.17 ± 0.33 | 0.93 ± 0.10                                        | 0.06 ± 0.02 | 0.03 ± 0.02 | 0.06 ± 0.02 | 0.02 ± 0.01  |
| PFM342     | <i>mutS</i>           | 3.05 ± 0.21 | 4.92 ± 0.44 | 1.10 ± 0.10                                        | 0.05 ± 0.02 | 0.02 ± 0.01 | 0.05 ± 0.02 | 0.01 ± 0.01  |
| PFM343     | <i>mutS</i>           | 2.75 ± 0.14 | 4.25 ± 0.25 | 1.15 ± 0.12                                        | 0.06 ± 0.03 | 0.03 ± 0.01 | 0.04 ± 0.01 | 0.02 ± 0.01  |
| PFM555/556 | <i>mutS</i>           | 2.47 ± 0.16 | 3.85 ± 0.31 | 1.04 ± 0.08                                        | 0.03 ± 0.01 | 0.01 ± 0.01 | 0.03 ± 0.01 | 0.02 ± 0.01  |
| PFM304     | <i>mutL mutS</i>      | 2.43 ± 0.14 | 4.01 ± 0.26 | 0.75 ± 0.08                                        | 0.05 ± 0.02 | 0.02 ± 0.01 | 0.04 ± 0.02 | 0.03 ± 0.01  |
| PFM197     | <i>mutH</i>           | 2.35 ± 0.28 | 3.28 ± 0.35 | 1.31 ± 0.17                                        | 0.05 ± 0.01 | 0.03 ± 0.01 | 0.04 ± 0.01 | 0.02 ± 0.004 |
| PFM567     | <i>mutL mutS mutH</i> | 2.26 ± 0.20 | 3.23 ± 0.34 | 1.20 ± 0.14                                        | 0.01 ± 0.01 | 0.05 ± 0.03 | 0.03 ± 0.02 | 0.03 ± 0.02  |
| PFM568     | <i>mutL mutS mutH</i> | 1.95 ± 0.15 | 2.61 ± 0.26 | 1.24 ± 0.21                                        | 0.03 ± 0.02 | 0.02 ± 0.02 | 0.01 ± 0.01 | 0.01 ± 0.02  |
| PFM191     | <i>uvrD</i>           | 1.29 ± 0.13 | 1.67 ± 0.18 | 0.82 ± 0.11                                        | 0.03 ± 0.01 | 0.03 ± 0.01 | 0.03 ± 0.01 | 0.02 ± 0.004 |

**Table S4B: Fractions of BPS of the MMR defective strains on LB medium at 37°C**

| Strain     | Genotype              | A:T>G:C     | G:C>A:T     | BPS Rate/Total Rate ± 95% CL |               |               |               |
|------------|-----------------------|-------------|-------------|------------------------------|---------------|---------------|---------------|
|            |                       |             |             | A:T>T:A                      | G:C>T:A       | A:T>C:G       | G:C>C:G       |
| *PFM5      | <i>mutL</i>           | 0.70 ± 0.09 | 0.28 ± 0.04 | 0.01 ± 0.004                 | 0.01 ± 0.004  | 0.01 ± 0.004  | 0.002 ± 0.002 |
| PFM144     | <i>mutL</i>           | 0.75 ± 0.10 | 0.21 ± 0.03 | 0.01 ± 0.01                  | 0.01 ± 0.004  | 0.01 ± 0.01   | 0.01 ± 0.005  |
| PFM288     | <i>mutL</i>           | 0.79 ± 0.08 | 0.18 ± 0.02 | 0.01 ± 0.004                 | 0.01 ± 0.003  | 0.01 ± 0.005  | 0.005 ± 0.002 |
| PFM342     | <i>mutS</i>           | 0.80 ± 0.09 | 0.18 ± 0.02 | 0.01 ± 0.004                 | 0.004 ± 0.002 | 0.01 ± 0.004  | 0.002 ± 0.002 |
| PFM343     | <i>mutS</i>           | 0.76 ± 0.06 | 0.21 ± 0.02 | 0.01 ± 0.005                 | 0.01 ± 0.002  | 0.01 ± 0.003  | 0.004 ± 0.002 |
| PFM555/556 | <i>mutS</i>           | 0.77 ± 0.08 | 0.21 ± 0.02 | 0.01 ± 0.003                 | 0.002 ± 0.002 | 0.01 ± 0.003  | 0.004 ± 0.002 |
| PFM304     | <i>mutL mutS</i>      | 0.81 ± 0.07 | 0.16 ± 0.02 | 0.01 ± 0.005                 | 0.005 ± 0.003 | 0.01 ± 0.003  | 0.01 ± 0.003  |
| PFM197     | <i>mutH</i>           | 0.69 ± 0.11 | 0.28 ± 0.05 | 0.01 ± 0.002                 | 0.01 ± 0.002  | 0.01 ± 0.003  | 0.004 ± 0.001 |
| PFM567     | <i>mutL mutS mutH</i> | 0.70 ± 0.09 | 0.27 ± 0.04 | 0.003 ± 0.002                | 0.01 ± 0.01   | 0.01 ± 0.004  | 0.01 ± 0.004  |
| PFM568     | <i>mutL mutS mutH</i> | 0.66 ± 0.08 | 0.32 ± 0.06 | 0.01 ± 0.01                  | 0.01 ± 0.005  | 0.004 ± 0.003 | 0.003 ± 0.004 |
| PFM191     | <i>uvrD</i>           | 0.64 ± 0.09 | 0.32 ± 0.05 | 0.01 ± 0.003                 | 0.01 ± 0.003  | 0.01 ± 0.003  | 0.01 ± 0.002  |

The data shown here except for those for PFM191 were combined for the results given as “MMR” in the Tables and Figures; see Materials and Methods for the analysis.

\* Data from (LEE *et al.* 2012)

**Table 5A. Total BPSs/Generation/Triplet of the MMR defective strains on LB medium at 37°C**

| Triplet | PFM5               | PFM144             | PFM288        | PFM304                              | PFM342        | PFM343        | PFM555/556         | PFM197             | PFM567        |                                     | PFM568        |                                     | Mean  | SD   |
|---------|--------------------|--------------------|---------------|-------------------------------------|---------------|---------------|--------------------|--------------------|---------------|-------------------------------------|---------------|-------------------------------------|-------|------|
|         | $\Delta mutL^{Sc}$ | $\Delta mutL^{Sc}$ | $\Delta mutL$ | $\Delta mutL$<br>$\Delta mutS^{Sc}$ | $\Delta mutS$ | $\Delta mutS$ | $\Delta mutS^{Sc}$ | $\Delta mutH^{Sc}$ | $\Delta mutS$ | $\Delta mutL$<br>$\Delta mutH^{Sc}$ | $\Delta mutS$ | $\Delta mutL$<br>$\Delta mutH^{Sc}$ |       |      |
| AAA+TTT | 0.36               | 0.45               | 0.29          | 0.25                                | 0.40          | 0.31          | 0.36               | 0.37               |               | 0.31                                |               | 0.18                                | 0.33  | 0.08 |
| AAC+GTT | 11.11              | 9.35               | 13.15         | 11.76                               | 13.96         | 11.88         | 11.63              | 9.58               |               | 9.07                                |               | 7.73                                | 10.92 | 1.95 |
| AAG+CTT | 1.23               | 1.32               | 1.27          | 1.12                                | 1.11          | 1.72          | 1.66               | 1.31               |               | 1.07                                |               | 1.78                                | 1.36  | 0.27 |
| AAT+ATT | 0.71               | 0.67               | 0.70          | 0.50                                | 0.71          | 0.60          | 0.37               | 0.47               |               | 0.49                                |               | 0.24                                | 0.55  | 0.16 |
| CAA+TTG | 0.41               | 0.41               | 0.41          | 0.36                                | 0.53          | 0.50          | 0.54               | 0.39               |               | 0.53                                |               | 0.26                                | 0.43  | 0.09 |
| CAC+GTG | 12.34              | 10.79              | 12.91         | 14.59                               | 15.59         | 14.04         | 12.06              | 10.39              |               | 10.10                               |               | 8.52                                | 12.13 | 2.22 |
| CAG+CTG | 2.11               | 1.14               | 1.96          | 1.35                                | 2.09          | 1.67          | 1.91               | 1.75               |               | 1.01                                |               | 1.09                                | 1.61  | 0.43 |
| CAT+ATG | 0.56               | 0.86               | 0.79          | 0.70                                | 1.26          | 0.51          | 0.46               | 0.58               |               | 0.71                                |               | 0.69                                | 0.71  | 0.23 |
| GAA+TTC | 1.27               | 0.79               | 1.44          | 1.21                                | 1.23          | 1.34          | 0.84               | 1.11               |               | 0.89                                |               | 0.72                                | 1.08  | 0.25 |
| GAC+GTC | 16.56              | 12.65              | 16.93         | 15.87                               | 21.33         | 17.46         | 15.24              | 11.73              |               | 12.07                               |               | 8.91                                | 14.87 | 3.57 |
| GAG+CTC | 1.84               | 0.82               | 1.63          | 2.18                                | 2.48          | 3.21          | 1.94               | 2.44               |               | 2.23                                |               | 2.37                                | 2.11  | 0.63 |
| GAT+ATC | 2.04               | 0.97               | 1.76          | 1.17                                | 1.73          | 1.87          | 1.27               | 1.58               |               | 1.41                                |               | 1.31                                | 1.51  | 0.34 |
| TAA+TTA | 0.85               | 0.40               | 0.58          | 0.69                                | 1.07          | 0.73          | 0.78               | 0.69               |               | 0.74                                |               | 0.23                                | 0.68  | 0.23 |
| TAC+GTA | 16.84              | 14.22              | 19.69         | 20.49                               | 23.69         | 19.50         | 18.69              | 15.18              |               | 15.91                               |               | 11.14                               | 17.53 | 3.61 |
| TAG+CTA | 2.61               | 2.06               | 2.56          | 2.27                                | 3.59          | 3.04          | 2.91               | 2.57               |               | 2.26                                |               | 2.10                                | 2.60  | 0.48 |
| TAT+ATA | 1.30               | 0.66               | 1.13          | 0.59                                | 1.20          | 1.40          | 0.68               | 0.98               |               | 1.23                                |               | 1.02                                | 1.02  | 0.29 |
| AGA+TCT | 0.49               | 0.12               | 0.08          | 0.11                                | 0.16          | 0.12          | 0.04               | 0.25               |               | 0.30                                |               | 0.36                                | 0.20  | 0.14 |
| AGC+GCT | 1.22               | 0.60               | 0.72          | 0.59                                | 0.76          | 0.62          | 0.69               | 0.83               |               | 0.97                                |               | 0.85                                | 0.79  | 0.19 |
| AGG+CCT | 0.39               | 0.14               | 0.27          | 0.39                                | 0.17          | 0.27          | 0.45               | 0.35               |               | 0.34                                |               | 0.24                                | 0.30  | 0.10 |
| AGT+ACT | 0.16               | 0.14               | 0.18          | 0.12                                | 0.29          | 0.14          | 0.12               | 0.26               |               | 0.07                                |               | 0.16                                | 0.16  | 0.07 |
| CGA+TCG | 1.37               | 0.68               | 0.66          | 0.58                                | 0.78          | 1.06          | 0.96               | 1.10               |               | 0.71                                |               | 1.30                                | 0.92  | 0.28 |
| CGC+GCG | 2.89               | 1.45               | 1.78          | 1.34                                | 1.89          | 2.00          | 2.19               | 2.73               |               | 2.44                                |               | 2.18                                | 2.09  | 0.51 |
| CGG+CCG | 1.89               | 0.96               | 1.21          | 0.73                                | 1.15          | 1.39          | 1.19               | 1.50               |               | 1.29                                |               | 1.95                                | 1.33  | 0.38 |
| CGT+ACG | 0.96               | 0.81               | 0.88          | 0.46                                | 0.96          | 0.81          | 0.71               | 1.26               |               | 0.93                                |               | 0.88                                | 0.87  | 0.20 |
| GGA+TCC | 1.82               | 1.24               | 0.80          | 0.95                                | 1.88          | 1.71          | 1.03               | 1.22               |               | 1.27                                |               | 0.94                                | 1.29  | 0.39 |
| GGC+GCC | 4.36               | 2.56               | 3.04          | 2.50                                | 3.20          | 3.10          | 2.51               | 3.65               |               | 3.55                                |               | 3.01                                | 3.15  | 0.59 |
| GGG+CCC | 1.56               | 1.32               | 1.08          | 1.08                                | 1.72          | 1.87          | 1.70               | 1.37               |               | 1.71                                |               | 2.04                                | 1.54  | 0.32 |
| GGT+ACC | 1.16               | 0.70               | 0.90          | 0.66                                | 1.26          | 1.10          | 1.25               | 1.21               |               | 1.23                                |               | 1.14                                | 1.06  | 0.23 |
| TGA+TCA | 0.89               | 0.58               | 0.35          | 0.35                                | 0.70          | 0.65          | 0.57               | 0.66               |               | 0.45                                |               | 0.82                                | 0.60  | 0.18 |

|           |      |      |      |      |      |      |      |      |      |      |      |      |
|-----------|------|------|------|------|------|------|------|------|------|------|------|------|
| TGC+GCA   | 1.35 | 1.06 | 1.24 | 0.93 | 1.17 | 1.55 | 1.13 | 1.73 | 1.81 | 1.14 | 1.31 | 0.29 |
| TGG+CCA   | 0.59 | 0.28 | 0.47 | 0.35 | 0.34 | 0.64 | 0.53 | 0.51 | 0.40 | 0.61 | 0.47 | 0.13 |
| TGT+ACA   | 1.07 | 0.59 | 0.38 | 0.61 | 0.45 | 0.62 | 0.50 | 0.80 | 0.98 | 1.11 | 0.71 | 0.26 |
| All A:T   | 4.00 | 3.19 | 4.28 | 4.11 | 5.02 | 4.35 | 3.91 | 3.37 | 3.27 | 2.65 | 3.82 | 0.69 |
| All G:C   | 1.53 | 0.90 | 0.99 | 0.80 | 1.14 | 1.20 | 1.07 | 1.36 | 1.27 | 1.27 | 1.15 | 0.22 |
| All sites | 2.75 | 2.03 | 2.61 | 2.43 | 3.05 | 2.75 | 2.47 | 2.35 | 2.26 | 1.95 | 2.46 | 0.34 |

**Table S5B. BPSs/Generation/Triplet of the MMR defective strains on LB medium at 37°C with the purine on the lagging strand template**

| Triplet | PFM5               | PFM144             | PFM288        | PFM304        | PFM342        | PFM343        | PFM555/556         | PFM197             | PFM567        |               | PFM568        |               | Mean  | SD   |
|---------|--------------------|--------------------|---------------|---------------|---------------|---------------|--------------------|--------------------|---------------|---------------|---------------|---------------|-------|------|
|         | $\Delta mutL^{Sc}$ | $\Delta mutL^{Sc}$ | $\Delta mutL$ | $\Delta mutL$ | $\Delta mutS$ | $\Delta mutS$ | $\Delta mutS^{Sc}$ | $\Delta mutH^{Sc}$ | $\Delta mutS$ | $\Delta mutL$ | $\Delta mutS$ | $\Delta mutL$ |       |      |
| AAA+TTT | 0.50               | 0.38               | 0.37          | 0.29          | 0.48          | 0.34          | 0.42               | 0.47               | 0.31          |               | 0.15          |               | 0.37  | 0.11 |
| AAC+GTT | 16.53              | 14.58              | 20.56         | 17.06         | 20.89         | 18.17         | 16.95              | 14.54              | 13.79         |               | 11.16         |               | 16.42 | 3.03 |
| AAG+CTT | 1.36               | 1.87               | 2.12          | 1.69          | 1.67          | 2.66          | 2.03               | 1.89               | 1.39          |               | 2.55          |               | 1.92  | 0.44 |
| AAT+ATT | 0.95               | 0.75               | 1.13          | 0.76          | 0.64          | 0.93          | 0.45               | 0.52               | 0.65          |               | 0.29          |               | 0.71  | 0.25 |
| CAA+TTG | 0.61               | 0.27               | 0.29          | 0.46          | 0.84          | 0.54          | 0.49               | 0.46               | 0.53          |               | 0.11          |               | 0.46  | 0.20 |
| CAC+GTG | 15.98              | 13.24              | 17.20         | 19.39         | 20.22         | 17.84         | 15.32              | 13.61              | 12.80         |               | 10.30         |               | 15.59 | 3.14 |
| CAG+CTG | 2.25               | 1.26               | 2.56          | 1.47          | 2.74          | 2.18          | 2.37               | 2.24               | 1.23          |               | 1.23          |               | 1.95  | 0.59 |
| CAT+ATG | 1.02               | 1.18               | 1.04          | 0.72          | 1.22          | 0.65          | 0.59               | 0.64               | 0.97          |               | 0.74          |               | 0.88  | 0.24 |
| GAA+TTC | 1.50               | 1.17               | 2.09          | 1.52          | 1.69          | 1.37          | 1.04               | 1.32               | 1.14          |               | 1.26          |               | 1.41  | 0.31 |
| GAC+GTC | 22.93              | 17.93              | 25.63         | 23.50         | 29.91         | 25.17         | 21.49              | 17.29              | 16.47         |               | 12.56         |               | 21.29 | 5.19 |
| GAG+CTC | 3.12               | 1.30               | 2.20          | 3.24          | 3.43          | 4.59          | 2.62               | 3.58               | 2.38          |               | 4.16          |               | 3.06  | 0.97 |
| GAT+ATC | 2.00               | 1.13               | 2.22          | 1.24          | 1.83          | 2.06          | 1.39               | 1.99               | 2.19          |               | 1.59          |               | 1.76  | 0.40 |
| TAA+TTA | 1.14               | 0.30               | 0.78          | 1.03          | 1.53          | 0.86          | 1.08               | 0.80               | 0.89          |               | 0.23          |               | 0.87  | 0.38 |
| TAC+GTA | 23.53              | 20.22              | 28.50         | 29.53         | 35.32         | 28.15         | 27.91              | 22.60              | 21.36         |               | 17.96         |               | 25.51 | 5.26 |
| TAG+CTA | 3.81               | 2.86               | 4.17          | 3.70          | 5.48          | 4.26          | 4.18               | 3.55               | 4.05          |               | 2.72          |               | 3.88  | 0.78 |
| TAT+ATA | 1.48               | 0.76               | 1.33          | 0.87          | 1.75          | 1.93          | 0.78               | 1.32               | 1.38          |               | 1.14          |               | 1.28  | 0.40 |
| AGA+TCT | 0.42               | 0.00               | 0.08          | 0.21          | 0.00          | 0.08          | 0.00               | 0.18               | 0.12          |               | 0.15          |               | 0.12  | 0.13 |
| AGC+GCT | 1.07               | 0.69               | 0.67          | 0.79          | 1.10          | 0.51          | 0.36               | 0.70               | 0.68          |               | 1.01          |               | 0.76  | 0.24 |
| AGG+CCT | 0.31               | 0.14               | 0.35          | 0.71          | 0.23          | 0.45          | 0.57               | 0.36               | 0.40          |               | 0.00          |               | 0.35  | 0.20 |
| AGT+ACT | 0.16               | 0.14               | 0.18          | 0.08          | 0.24          | 0.09          | 0.08               | 0.26               | 0.00          |               | 0.16          |               | 0.14  | 0.08 |
| CGA+TCG | 1.31               | 0.39               | 0.31          | 0.44          | 0.57          | 0.64          | 0.58               | 0.59               | 0.47          |               | 0.45          |               | 0.57  | 0.28 |
| CGC+GCG | 1.78               | 0.85               | 1.13          | 0.83          | 1.23          | 1.23          | 1.70               | 1.44               | 1.30          |               | 1.34          |               | 1.28  | 0.31 |

|           |      |      |      |      |      |      |      |      |      |      |      |      |
|-----------|------|------|------|------|------|------|------|------|------|------|------|------|
| CGG+CCG   | 1.17 | 0.88 | 0.57 | 0.50 | 0.74 | 1.00 | 0.67 | 0.97 | 0.31 | 1.21 | 0.80 | 0.30 |
| CGT+ACG   | 0.32 | 0.29 | 0.67 | 0.22 | 0.24 | 0.37 | 0.34 | 0.68 | 0.46 | 0.44 | 0.40 | 0.16 |
| GGA+TCC   | 0.70 | 0.75 | 0.40 | 0.49 | 1.05 | 1.30 | 0.59 | 0.66 | 1.09 | 0.72 | 0.78 | 0.28 |
| GGC+GCC   | 2.55 | 1.51 | 1.55 | 1.16 | 2.29 | 1.68 | 1.53 | 2.01 | 1.84 | 1.58 | 1.77 | 0.41 |
| GGG+CCC   | 1.32 | 1.32 | 0.38 | 0.83 | 1.36 | 1.54 | 0.87 | 0.99 | 0.86 | 1.02 | 1.05 | 0.34 |
| GGT+ACC   | 0.74 | 0.66 | 0.60 | 0.32 | 0.63 | 0.68 | 0.78 | 0.55 | 0.36 | 0.65 | 0.60 | 0.15 |
| TGA+TCA   | 0.56 | 0.58 | 0.16 | 0.14 | 0.21 | 0.38 | 0.35 | 0.40 | 0.32 | 0.39 | 0.35 | 0.15 |
| TGC+GCA   | 0.74 | 0.58 | 0.80 | 0.62 | 0.55 | 0.91 | 0.74 | 0.97 | 1.28 | 0.25 | 0.75 | 0.28 |
| TGG+CCA   | 0.64 | 0.41 | 0.26 | 0.09 | 0.41 | 0.59 | 0.58 | 0.33 | 0.32 | 0.28 | 0.39 | 0.17 |
| TGT+ACA   | 0.54 | 0.60 | 0.31 | 0.54 | 0.30 | 0.39 | 0.21 | 0.67 | 0.70 | 0.69 | 0.49 | 0.18 |
| All A:T   | 5.44 | 4.37 | 6.21 | 5.77 | 7.04 | 6.07 | 5.40 | 4.77 | 4.45 | 3.69 | 5.32 | 1.01 |
| All G:C   | 0.98 | 0.65 | 0.59 | 0.52 | 0.75 | 0.78 | 0.69 | 0.80 | 0.72 | 0.70 | 0.72 | 0.13 |
| All sites | 3.18 | 2.48 | 3.36 | 3.11 | 3.85 | 3.39 | 3.01 | 2.76 | 2.56 | 2.18 | 2.99 | 0.50 |

**Table S5C. BPSs/Generation/Triplet of the MMR defective strains on LB medium at 37°C with the purine on the leading strand template**

| Triplet | PFM5               | PFM144             | PFM288        | PFM304        | PFM342        | PFM343        | PFM555/556         | PFM197             | PFM567        |               | PFM568        |               | Mean | SD   |
|---------|--------------------|--------------------|---------------|---------------|---------------|---------------|--------------------|--------------------|---------------|---------------|---------------|---------------|------|------|
|         | $\Delta mutL^{Sc}$ | $\Delta mutL^{Sc}$ | $\Delta mutL$ | $\Delta mutL$ | $\Delta mutS$ | $\Delta mutS$ | $\Delta mutS^{Sc}$ | $\Delta mutH^{Sc}$ | $\Delta mutS$ | $\Delta mutL$ | $\Delta mutS$ | $\Delta mutL$ |      |      |
| AAA+TTT | 0.21               | 0.51               | 0.20          | 0.22          | 0.32          | 0.29          | 0.30               | 0.26               | 0.31          |               | 0.22          |               | 0.28 | 0.09 |
| AAC+GTT | 5.70               | 4.13               | 5.73          | 6.47          | 7.03          | 5.58          | 6.32               | 4.61               | 4.35          |               | 4.31          |               | 5.42 | 1.02 |
| AAG+CTT | 1.11               | 0.77               | 0.42          | 0.56          | 0.55          | 0.79          | 1.30               | 0.72               | 0.75          |               | 1.02          |               | 0.80 | 0.27 |
| AAT+ATT | 0.47               | 0.58               | 0.27          | 0.24          | 0.77          | 0.27          | 0.30               | 0.42               | 0.33          |               | 0.19          |               | 0.38 | 0.18 |
| CAA+TTG | 0.20               | 0.54               | 0.52          | 0.26          | 0.23          | 0.47          | 0.59               | 0.32               | 0.53          |               | 0.42          |               | 0.41 | 0.14 |
| CAC+GTG | 8.66               | 8.32               | 8.58          | 9.76          | 10.92         | 10.21         | 8.77               | 7.14               | 7.38          |               | 6.73          |               | 8.65 | 1.35 |
| CAG+CTG | 1.98               | 1.01               | 1.35          | 1.23          | 1.43          | 1.15          | 1.45               | 1.24               | 0.79          |               | 0.94          |               | 1.26 | 0.33 |
| CAT+ATG | 0.10               | 0.55               | 0.53          | 0.67          | 1.31          | 0.36          | 0.33               | 0.52               | 0.44          |               | 0.64          |               | 0.55 | 0.32 |
| GAA+TTC | 1.03               | 0.42               | 0.80          | 0.90          | 0.77          | 1.31          | 0.64               | 0.91               | 0.65          |               | 0.19          |               | 0.76 | 0.31 |
| GAC+GTC | 10.13              | 7.32               | 8.16          | 8.17          | 12.66         | 9.68          | 8.94               | 6.13               | 7.63          |               | 5.22          |               | 8.40 | 2.11 |
| GAG+CTC | 0.55               | 0.33               | 1.05          | 1.12          | 1.52          | 1.83          | 1.27               | 1.30               | 2.08          |               | 0.57          |               | 1.16 | 0.56 |
| GAT+ATC | 2.08               | 0.80               | 1.29          | 1.10          | 1.63          | 1.69          | 1.15               | 1.17               | 0.63          |               | 1.03          |               | 1.26 | 0.44 |
| TAA+TTA | 0.57               | 0.51               | 0.39          | 0.34          | 0.60          | 0.60          | 0.48               | 0.58               | 0.59          |               | 0.23          |               | 0.49 | 0.13 |
| TAC+GTA | 10.14              | 8.21               | 10.87         | 11.44         | 12.05         | 10.84         | 9.45               | 7.74               | 10.44         |               | 4.31          |               | 9.55 | 2.28 |
| TAG+CTA | 1.44               | 1.28               | 0.98          | 0.87          | 1.72          | 1.84          | 1.67               | 1.62               | 0.50          |               | 1.48          |               | 1.34 | 0.43 |



|           |      |      |      |      |      |      |      |      |      |      |      |      |
|-----------|------|------|------|------|------|------|------|------|------|------|------|------|
| TAT+ATA   | 1.12 | 0.55 | 0.92 | 0.31 | 0.65 | 0.86 | 0.59 | 0.65 | 1.07 | 0.89 | 0.76 | 0.25 |
| AGA+TCT   | 0.55 | 0.25 | 0.08 | 0.00 | 0.31 | 0.16 | 0.07 | 0.32 | 0.48 | 0.57 | 0.28 | 0.21 |
| AGC+GCT   | 1.36 | 0.52 | 0.77 | 0.39 | 0.44 | 0.73 | 1.02 | 0.95 | 1.26 | 0.70 | 0.81 | 0.33 |
| AGG+CCT   | 0.46 | 0.14 | 0.18 | 0.08 | 0.12 | 0.09 | 0.33 | 0.34 | 0.27 | 0.48 | 0.25 | 0.15 |
| AGT+ACT   | 0.16 | 0.14 | 0.18 | 0.16 | 0.35 | 0.18 | 0.17 | 0.26 | 0.14 | 0.16 | 0.19 | 0.07 |
| CGA+TCG   | 1.44 | 0.98 | 1.01 | 0.73 | 0.99 | 1.48 | 1.34 | 1.62 | 0.96 | 2.17 | 1.27 | 0.43 |
| CGC+GCG   | 4.00 | 2.05 | 2.43 | 1.85 | 2.54 | 2.76 | 2.68 | 4.00 | 3.57 | 3.01 | 2.89 | 0.76 |
| CGG+CCG   | 2.61 | 1.04 | 1.85 | 0.95 | 1.55 | 1.78 | 1.71 | 2.03 | 2.26 | 2.69 | 1.85 | 0.58 |
| CGT+ACG   | 1.61 | 1.33 | 1.10 | 0.70 | 1.68 | 1.25 | 1.07 | 1.83 | 1.39 | 1.32 | 1.33 | 0.33 |
| GGA+TCC   | 2.93 | 1.73 | 1.19 | 1.41 | 2.71 | 2.11 | 1.47 | 1.78 | 1.45 | 1.15 | 1.79 | 0.61 |
| GGC+GCC   | 6.16 | 3.59 | 4.52 | 3.83 | 4.10 | 4.51 | 3.47 | 5.28 | 5.25 | 4.44 | 4.52 | 0.84 |
| GGG+CCC   | 1.81 | 1.31 | 1.78 | 1.33 | 2.09 | 2.20 | 2.51 | 1.74 | 2.55 | 3.05 | 2.04 | 0.56 |
| GGT+ACC   | 1.57 | 0.74 | 1.19 | 1.00 | 1.88 | 1.52 | 1.71 | 1.87 | 2.08 | 1.62 | 1.52 | 0.42 |
| TGA+TCA   | 1.21 | 0.58 | 0.53 | 0.56 | 1.19 | 0.92 | 0.79 | 0.93 | 0.56 | 1.25 | 0.85 | 0.29 |
| TGC+GCA   | 1.96 | 1.52 | 1.67 | 1.24 | 1.77 | 2.19 | 1.51 | 2.49 | 2.33 | 2.02 | 1.87 | 0.40 |
| TGG+CCA   | 0.54 | 0.16 | 0.67 | 0.60 | 0.27 | 0.69 | 0.48 | 0.68 | 0.47 | 0.94 | 0.55 | 0.22 |
| TGT+ACA   | 1.61 | 0.59 | 0.46 | 0.67 | 0.60 | 0.86 | 0.78 | 0.92 | 1.27 | 1.52 | 0.93 | 0.40 |
| All A:T   | 2.56 | 2.00 | 2.35 | 2.44 | 3.00 | 2.63 | 2.42 | 1.97 | 2.10 | 1.61 | 2.31 | 0.40 |
| All G:C   | 2.08 | 1.15 | 1.38 | 1.08 | 1.52 | 1.61 | 1.44 | 1.91 | 1.83 | 1.83 | 1.58 | 0.33 |
| All sites | 2.32 | 1.57 | 1.86 | 1.75 | 2.25 | 2.11 | 1.92 | 1.94 | 1.96 | 1.72 | 1.94 | 0.23 |

The data shown here were combined for the results given as “MMR” in the tables and figures; see Materials and Methods for the analysis.

**Table S6. Colony sizes of the  $\Delta mutS$  mutant strain at different times and temperatures**

| Colony:                    | Colony diameter in mm, 24 hrs after streaking on LB agar medium |       |       |       | Colony diameter in mm, 48 hrs after streaking on LB agar medium |       |       |       |
|----------------------------|-----------------------------------------------------------------|-------|-------|-------|-----------------------------------------------------------------|-------|-------|-------|
|                            | Temperature                                                     |       |       |       | Temperature                                                     |       |       |       |
|                            | 37°C                                                            | 30 °C | 28 °C | 26 °C | 37 °C                                                           | 30 °C | 28 °C | 26 °C |
| 1                          | 2.9                                                             | 1.9   | 1.2   | 1.1   | 5                                                               | 3     | 3     | 2.5   |
| 2                          | 3                                                               | 2     | 1.1   | 1     | 4                                                               | 3     | 2     | 2.5   |
| 3                          | 3                                                               | 2     | 1     | 0.8   | 4                                                               | 2.5   | 1.5   | 2     |
| 4                          | 2.9                                                             | 1.6   | 1.2   | 0.9   | 4                                                               | 2.5   | 2     | 2     |
| 5                          | 2.2*                                                            | 1.3   | 1     | 1     | 2.5*                                                            | 2.5   | 2     | 2     |
| 6                          | 2.1*                                                            | 1     | 1.2   | 1     | 2.5*                                                            | 2     | 1.5   | 2     |
| Average                    | 2.68                                                            | 1.63  | 1.12  | 0.97  | 3.67                                                            | 2.58  | 2     | 2.17  |
| SD                         | 0.42                                                            | 0.41  | 0.1   | 0.1   | 0.98                                                            | 0.38  | 0.55  | 0.26  |
| Compared to 24 hrs at 37°C | 1                                                               | 0.61  | 0.42  | 0.36  | 1.37                                                            | 0.96  | 0.75  | 0.81  |

$\Delta mutS$  mutant strain PFM342 was streaked from frozen onto 4 LB agar plates that were then incubated at the indicated temperature. Diameters of 6 colonies were measured at 24 and 48 hrs.

\* These small colonies were close together

**Table S7: The sequence context of repeat base-pair substitutions associated with runs**

| No. of occurrences | Nt Position | Type of BPS | Sequence context*    |    |    |    |    |          |   |                      |   |   |   |   |   |   |   | Run length | Consistent with transient misalignment? |
|--------------------|-------------|-------------|----------------------|----|----|----|----|----------|---|----------------------|---|---|---|---|---|---|---|------------|-----------------------------------------|
|                    |             |             | 5' from mutated base |    |    |    |    |          |   | 3' from mutated base |   |   |   |   |   |   |   |            |                                         |
|                    |             |             | -5                   | -4 | -3 | -2 | -1 | 0        | 1 | 2                    | 3 | 4 | 5 | 6 | 7 | 8 | 9 |            |                                         |
| 5                  | 4604118     | AT>GC       | T                    | C  | A  | A  | G  | <b>T</b> | C | C                    | C | C | C | C | C | C | T | 8          | YES                                     |
| 5                  | 2819446     | GC>CG       | G                    | G  | A  | G  | G  | <b>G</b> | C | C                    | C | C | C | C | C | A | A | 7          | YES                                     |
| 4                  | 4604239     | AT>GC       | T                    | C  | A  | A  | G  | <b>T</b> | C | C                    | C | C | C | C | C | C | T | 8          | YES                                     |
| 4                  | 3377281     | AT>GC       | T                    | C  | G  | T  | T  | <b>T</b> | C | C                    | C | C | C | C | C | G | C | 7          | YES                                     |
| †4                 | 284872      | GC>CG       | G                    | G  | A  | T  | G  | <b>G</b> | C | C                    | C | C | C | C | A | C | A | 6          | YES                                     |
| †1                 | 284872      | GC>AT       | G                    | G  | A  | T  | G  | <b>G</b> | C | C                    | C | C | C | C | A | C | A | 6          | NO                                      |
| 4                  | 2730715     | AT>GC       | C                    | C  | A  | G  | G  | <b>T</b> | C | C                    | C | C | C | A | C | A | C | 5          | YES                                     |
| 3                  | 4604354     | AT>GC       | T                    | C  | A  | A  | G  | <b>T</b> | C | C                    | C | C | C | C | C | C | T | 8          | YES                                     |
| 3                  | 320789      | AT>GC       | A                    | T  | G  | T  | T  | <b>T</b> | C | C                    | C | C | C | C | C | A | C | 7          | YES                                     |
| 3                  | 2953118     | AT>GC       | G                    | G  | G  | T  | T  | <b>T</b> | C | C                    | C | C | C | C | C | G | G | 7          | YES                                     |
| 3                  | 2743627     | AT>GC       | A                    | G  | C  | T  | G  | <b>T</b> | C | C                    | C | C | A | T | T | C | C | 4          | YES                                     |
| 3                  | 195808      | AT>GC       | A                    | G  | C  | T  | G  | <b>T</b> | C | C                    | C | C | A | T | T | C | C | 4          | YES                                     |
| 3                  | 921950      | AT>GC       | C                    | C  | T  | T  | G  | <b>T</b> | C | C                    | C | C | T | G | T | C | A | 4          | YES                                     |
| 3                  | 4521567     | AT>GC       | G                    | C  | T  | G  | G  | <b>T</b> | C | C                    | C | C | G | G | C | G | G | 4          | YES                                     |
| 3                  | 865431      | AT>GC       | A                    | T  | C  | A  | A  | <b>A</b> | C | C                    | C | C | G | G | A | A | C | 4          | NO                                      |
| 2                  | 149559      | GC>AT       | A                    | A  | C  | A  | G  | <b>G</b> | A | A                    | A | A | A | A | A | A | C | 8          | YES                                     |
| 2                  | 1592272     | AT>GC       | C                    | A  | A  | T  | T  | <b>T</b> | C | C                    | C | C | C | C | C | C | A | 8          | YES                                     |
| 2                  | 2680172     | AT>GC       | G                    | C  | C  | C  | T  | <b>T</b> | C | C                    | C | C | C | C | C | T | T | 7          | YES                                     |
| 2                  | 2765522     | AT>GC       | A                    | A  | A  | T  | T  | <b>T</b> | C | C                    | C | C | C | C | C | T | T | 7          | YES                                     |
| 2                  | 119745      | AT>GC       | C                    | A  | G  | G  | T  | <b>T</b> | C | C                    | C | C | C | C | G | C | G | 6          | YES                                     |
| 2                  | 212815      | AT>GC       | C                    | C  | A  | G  | T  | <b>T</b> | C | C                    | C | C | C | C | T | T | G | 6          | YES                                     |
| 2                  | 247672      | AT>GC       | C                    | A  | T  | G  | T  | <b>T</b> | C | C                    | C | C | C | C | T | G | A | 6          | YES                                     |
| 2                  | 998926      | AT>GC       | T                    | T  | A  | T  | G  | <b>T</b> | C | C                    | C | C | C | C | G | T | T | 6          | YES                                     |
| 2                  | 1207272     | AT>GC       | G                    | T  | A  | T  | A  | <b>T</b> | C | C                    | C | C | C | C | C | T | T | 6          | YES                                     |
| 2                  | 1336066     | AT>GC       | C                    | G  | T  | C  | A  | <b>T</b> | C | C                    | C | C | C | C | T | T | C | 6          | YES                                     |
| 2                  | 1594791     | AT>GC       | C                    | A  | C  | A  | T  | <b>T</b> | C | C                    | C | C | C | C | G | T | G | 6          | YES                                     |
| 2                  | 2008710     | AT>GC       | C                    | A  | G  | T  | C  | <b>T</b> | C | C                    | C | C | C | C | G | A | A | 6          | YES                                     |
| 2                  | 2208489     | AT>GC       | C                    | A  | G  | C  | G  | <b>T</b> | C | C                    | C | C | C | C | G | C | C | 6          | YES                                     |

|    |         |       |   |   |   |   |   |          |   |   |   |   |   |   |   |   |   |   |     |
|----|---------|-------|---|---|---|---|---|----------|---|---|---|---|---|---|---|---|---|---|-----|
| 2  | 2882109 | AT>GC | G | A | C | T | T | <b>T</b> | C | C | C | C | C | C | G | T | T | 6 | YES |
| 2  | 3012989 | AT>GC | G | G | T | T | T | <b>T</b> | C | C | C | C | C | C | A | G | C | 6 | YES |
| 2  | 3335117 | AT>GC | G | C | C | A | G | <b>T</b> | C | C | C | C | C | C | G | T | A | 6 | YES |
| 2  | 4561802 | AT>GC | A | C | C | T | G | <b>T</b> | C | C | C | C | C | C | G | G | C | 6 | YES |
| 2  | 1227842 | AT>GC | G | A | G | G | G | <b>T</b> | A | A | A | A | A | A | A | C | A | 6 | NO  |
| †2 | 756054  | GC>CG | G | T | G | T | G | <b>G</b> | C | C | C | C | C | A | C | G | G | 5 | YES |
| †1 | 756054  | GC>AT | G | T | G | T | G | <b>G</b> | C | C | C | C | C | A | C | G | G | 5 | NO  |
| 2  | 178096  | GC>CG | A | A | C | T | G | <b>G</b> | C | C | C | C | C | T | G | G | A | 5 | YES |
| 2  | 698617  | GC>CG | A | T | T | T | G | <b>G</b> | C | C | C | C | C | G | T | A | A | 5 | YES |
| 2  | 1513684 | AT>GC | A | A | A | C | G | <b>T</b> | C | C | C | C | C | G | T | T | G | 5 | YES |
| 2  | 2070147 | AT>GC | T | C | C | G | G | <b>T</b> | C | C | C | C | C | T | T | C | C | 5 | YES |
| 2  | 2071691 | AT>GC | A | G | A | A | G | <b>T</b> | C | C | C | C | C | T | G | T | A | 5 | YES |
| 2  | 2074259 | AT>GC | G | G | A | A | G | <b>T</b> | C | C | C | C | C | G | T | G | A | 5 | YES |
| 2  | 2563582 | AT>GC | T | A | T | A | G | <b>T</b> | C | C | C | C | C | G | C | G | C | 5 | YES |
| 2  | 2925702 | AT>GC | T | C | C | G | C | <b>T</b> | C | C | C | C | C | G | G | T | G | 5 | YES |
| 2  | 4528093 | AT>GC | C | T | C | A | G | <b>T</b> | C | C | C | C | C | T | A | T | C | 5 | YES |
| 2  | 1831229 | GC>AT | A | T | C | A | C | <b>G</b> | C | C | C | C | C | G | T | C | T | 5 | NO  |
| 2  | 3370127 | GC>AT | C | G | A | C | G | <b>G</b> | C | C | C | C | C | A | C | A | G | 5 | NO  |
| 2  | 3267978 | AT>GC | A | A | A | A | G | <b>T</b> | A | A | A | A | A | C | C | C | G | 5 | NO  |
| 2  | 1476862 | AT>GC | C | A | A | T | G | <b>T</b> | T | T | T | T | C | C | C | G | G | 5 | YES |
| 2  | 8296    | AT>GC | C | G | A | T | G | <b>T</b> | C | C | C | C | A | G | T | G | T | 4 | YES |
| 2  | 164633  | AT>GC | A | T | C | G | G | <b>T</b> | C | C | C | C | T | C | T | C | C | 4 | YES |
| 2  | 280037  | AT>GC | C | C | A | T | G | <b>T</b> | C | C | C | C | G | A | C | C | A | 4 | YES |
| 2  | 285142  | AT>GC | G | C | T | C | G | <b>T</b> | C | C | C | C | T | T | T | G | C | 4 | YES |
| 2  | 604964  | AT>GC | C | G | G | C | G | <b>T</b> | C | C | C | C | T | T | T | A | T | 4 | YES |
| 2  | 732668  | AT>GC | T | A | T | A | G | <b>T</b> | C | C | C | C | T | T | T | A | C | 4 | YES |
| 2  | 1072271 | AT>GC | T | A | A | C | G | <b>T</b> | C | C | C | C | A | T | A | T | T | 4 | YES |
| 2  | 1114343 | AT>GC | A | T | T | T | G | <b>T</b> | C | C | C | C | A | A | C | G | C | 4 | YES |
| 2  | 1124625 | AT>GC | T | A | T | T | G | <b>T</b> | C | C | C | C | G | A | A | G | T | 4 | YES |
| 2  | 1179612 | AT>GC | T | T | G | C | G | <b>T</b> | C | C | C | C | T | T | G | C | A | 4 | YES |
| 2  | 1485764 | AT>GC | G | A | T | T | G | <b>T</b> | C | C | C | C | A | G | T | C | A | 4 | YES |
| 2  | 1801735 | AT>GC | G | C | A | T | G | <b>T</b> | C | C | C | C | T | T | A | G | T | 4 | YES |
| 2  | 1819069 | AT>GC | A | C | C | C | C | <b>T</b> | C | C | C | C | A | A | A | G | C | 4 | YES |
| 2  | 2292056 | AT>GC | G | A | A | A | G | <b>T</b> | C | C | C | C | A | A | C | A | G | 4 | YES |

|    |         |       |   |   |   |   |   |          |   |   |   |   |   |   |   |   |   |   |        |
|----|---------|-------|---|---|---|---|---|----------|---|---|---|---|---|---|---|---|---|---|--------|
| 2  | 2352672 | AT>GC | A | G | A | A | G | <b>T</b> | C | C | C | C | G | T | C | T | G | 4 | YES    |
| 2  | 2769240 | AT>GC | T | G | C | G | G | <b>T</b> | C | C | C | C | G | G | A | C | T | 4 | YES    |
| 2  | 3071457 | AT>GC | A | T | C | G | C | <b>T</b> | C | C | C | C | T | G | G | C | G | 4 | YES    |
| 2  | 3169922 | AT>GC | A | A | C | C | G | <b>T</b> | C | C | C | C | A | A | A | A | A | 4 | YES    |
| 2  | 3512084 | AT>GC | A | A | A | C | G | <b>T</b> | C | C | C | C | T | C | T | T | C | 4 | YES    |
| 2  | 3917888 | AT>GC | T | C | C | A | G | <b>T</b> | C | C | C | C | T | T | A | A | G | 4 | YES    |
| 2  | 4306386 | AT>GC | C | T | T | T | G | <b>T</b> | C | C | C | C | A | A | T | C | T | 4 | YES    |
| 2  | 4382888 | AT>GC | C | G | G | C | G | <b>T</b> | C | C | C | C | T | G | G | A | T | 4 | YES    |
| 2  | 303014  | AT>GC | T | T | G | T | T | <b>A</b> | C | C | C | C | T | G | A | A | A | 4 | NO     |
| 2  | 1037031 | AT>GC | T | T | T | G | T | <b>A</b> | C | C | C | C | T | T | A | C | C | 4 | NO     |
| 2  | 1386996 | AT>GC | T | A | C | A | T | <b>A</b> | C | C | C | C | G | T | T | T | G | 4 | NO     |
| 2  | 1485713 | AT>GC | T | C | A | G | G | <b>A</b> | C | C | C | C | A | C | C | A | T | 4 | NO     |
| 2  | 1820478 | AT>GC | A | T | T | G | A | <b>A</b> | C | C | C | C | T | C | C | A | G | 4 | NO     |
| 2  | 2648824 | AT>GC | A | G | A | A | A | <b>A</b> | C | C | C | C | G | C | T | A | A | 4 | NO     |
| 2  | 3173706 | AT>GC | C | G | A | G | A | <b>A</b> | C | C | C | C | T | A | C | A | C | 4 | NO     |
| 2  | 1108783 | AT>GC | T | G | A | A | G | <b>A</b> | C | C | C | C | A | T | T | C | A | 4 | NO     |
| 2  | 3191199 | AT>GC | G | C | G | G | G | <b>T</b> | A | A | A | A | C | C | T | T | C | 4 | NO     |
| 2  | 111326  | AT>GC | A | G | C | C | G | <b>T</b> | G | G | G | G | T | A | A | A | G | 4 | NO     |
| 2  | 337229  | AT>GC | G | T | T | G | G | <b>T</b> | G | G | G | G | T | C | A | A | T | 4 | NO     |
| 2  | 4500425 | AT>GC | A | G | C | T | G | <b>T</b> | G | G | G | G | T | G | T | C | T | 4 | NO     |
| 82 |         |       |   |   |   |   |   |          |   |   |   |   |   |   |   |   |   |   | 63 YES |
|    |         |       |   |   |   |   |   |          |   |   |   |   |   |   |   |   |   |   | 19 NO  |

\*The sequences have been arranged so that the run is 3' to the mutated base.

†Two different types of BPSs occurred at this basepair, one that is consistent with transient misalignment and one that is not.

**Table S8: Mutation rates to NalR of  $\Delta mutL \Delta nfi$  and  $\Delta mutL \Delta rdgB$  strains as determined by fluctuation test**

|                                           | PFM244<br><i><math>\Delta mutL</math></i> | PFM794<br><i><math>\Delta mutL \Delta nfi</math></i> | PFM800<br><i><math>\Delta mutL \Delta rdgB</math></i> |
|-------------------------------------------|-------------------------------------------|------------------------------------------------------|-------------------------------------------------------|
| Mutations/generation x $10^8 \pm 95\%$ CL | $1.14 \pm 0.12$                           | $1.20 \pm 0.12$                                      | $1.03 \pm 0.11$                                       |

The mutation rates were calculated from 30, 32, and 32 parallel cultures of PFM244, PFM794, and PFM800, respectively, plated on LB plus nalidixic acid agar. See Supplemental Materials and Methods for details.

## REFERENCES

- Baba, T., T. Ara, M. Hasegawa, Y. Takai, Y. Okumura *et al.*, 2006 Construction of *Escherichia coli* K-12 in-frame, single-gene knockout mutants: the Keio collection. *Molecular Systems Biology* 2: 2006.
- Blank, K., M. Hensel and R. G. Gerlach, 2011 Rapid and highly efficient method for scarless mutagenesis within the *Salmonella enterica* chromosome. *PLoS One* 6: e15763.
- Datsenko, K. A., and B. L. Wanner, 2001 One-step inactivation of chromosomal genes in *Escherichia coli* K-12 using PCR products. *Proceedings of the National Academy of Sciences, USA* 97: 6640-6645.
- Foster, P. L., and J. Cairns, 1992 Mechanisms of directed mutation. *Genetics* 131: 783-789.
- Foster, P. L., H. Lee, E. Popodi, J. P. Townes and H. Tang, 2015 Determinants of spontaneous mutation in the bacterium *Escherichia coli* as revealed by whole-genome sequencing. *Proc Natl Acad Sci U S A* 112: E5990-E5599.
- Lee, H., E. Popodi, H. Tang and P. L. Foster, 2012 Rate and molecular spectrum of spontaneous mutations in the bacterium *Escherichia coli* as determined by whole-genome sequencing. *Proceedings of the National Academy of Sciences, USA* 109: E2774-E2783.
- Maenhaut-Michel, G., R. Janel-Bintz and R. P. Fuchs, 1992 A umuDC-independent SOS pathway for frameshift mutagenesis. *Mol Gen Genet* 235: 373-380.
- Miller, J. H., 1992 *A short course in bacterial genetics: a laboratory manual and handbook for Escherichia coli and related bacteria*. Cold Spring Harbor Laboratory Press, Cold Spring Harbor.
